# Supplementary material for: Intercalation vs Adsorption Strategies of Myo-Inositol Hexakisphosphate into Zn–Fe Layered Double Hydroxide: A Tiff between Anion Exchange and Coprecipitation
Source: PubMed Central journal article supplement — ACS Omega. 2023 Nov 3;8(45):43151–62. doi: 10.1021/acsomega.3c06788 (PMC10652260; doi:10.1021/acsomega.3c06788), 2023-11-03
Supplement: ao3c06788_si_001.pdf [file ao3c06788_si_001.pdf]

Supplementary information

# Intercalation vs Adsorption Strategies of Myo- inositol hexakisphosphate into Zn-Fe Layered Double Hydroxide: A tiff between Anion exchange and Co-precipitation

*Rimjim Gogoi<sup>a</sup>, Madhusmita Baruah<sup>a</sup>, Arup Borgohain<sup>a</sup>, Jiban Saikia<sup>a\*</sup>, Vishwa Jyoti Baruah<sup>b</sup>,  
Satter Rohman<sup>a</sup>, Mohini Singh<sup>c</sup>, Rahul Kar<sup>a</sup>, Sandeep Kumar Dey<sup>d</sup>, Bhaskar Mazumder<sup>c</sup>,  
Tanmoy Karak<sup>e\*</sup>,*

a. Department of Chemistry, Dibrugarh University, Dibrugarh-786004, Assam, India

b. Centre for Biotechnology and Bioinformatics, Dibrugarh University, Dibrugarh-786004, Assam, India

c. Department of Pharmaceutical Sciences, Dibrugarh University, Dibrugarh-786004, Assam, India

d. CSIR-North East Institute of Science and Technology, Jorhat, Assam, India

e. Department of Soil Science, Nagaland University, Dimapur-797106, Nagaland, India

\*E-mail: [jibansaikia@dibru.ac.in](mailto:jibansaikia@dibru.ac.in); [tanmoy@nagalanduniversity.ac.in](mailto:tanmoy@nagalanduniversity.ac.in)

| <b>Table of contents</b> |                                                                | <b>Page</b> |
|--------------------------|----------------------------------------------------------------|-------------|
| 1.                       | Optimized cartesian coordinates of Phytic Acid                 | 1           |
| 2.                       | Optimized bond lengths in Phytic Acid                          | 3           |
| 3.                       | EDX spectra for ZLDH and Z1                                    | 5           |
| 4.                       | Elemental composition for ZLDH and Z1                          | 5           |
| 5.                       | XPS survey spectra for (a) ZLDH, (b) Z1, (c) ZAP1 and (d) ZAP5 | 6           |
| 6.                       | XPS spectra for (a) Zn and (b) Fe in Zn-Fe-Cl LDH              | 7           |
| 7.                       | C 1s spectra for ZLDH, Z1 and ZAP5                             | 7           |
| 8.                       | Deconvoluted XPS spectra of O 1s for ZLDH, Z1 and ZAP5         | 8           |
| 9.                       | HRTEM images for ZLDH and Z1                                   | 9           |
| 10.                      | FTIR spectra for (a) Z2, (b) Z3, (c) Z4 and (d) Z5             | 10          |
| 11.                      | Variation of adsorption capacity with time                     | 10          |
| 12.                      | Variation of adsorption capacity with pH of solution           | 11          |
| 13.                      | PXRD pattern for Calcined ZLDH and reconstruction product      | 11          |

**Table S1.** Cartesian coordinates of phytic acid molecule optimized in B3LYP/6-31G(d) level of theory.

| Atomic Number | X         | Y         | Z         |
|---------------|-----------|-----------|-----------|
| 6             | -0.129230 | 1.253184  | -0.523159 |
| 6             | -1.251195 | 0.216859  | -0.280950 |
| 6             | -1.101288 | -1.064688 | -1.126135 |
| 6             | 0.324678  | -1.632100 | -1.325499 |
| 6             | 1.363216  | -0.511545 | -1.476226 |
| 6             | 1.251960  | 0.567459  | -0.387016 |
| 1             | -1.281139 | -0.020776 | 0.783516  |
| 1             | -0.228751 | 1.678979  | -1.529669 |
| 1             | 0.313970  | -2.214978 | -2.250320 |
| 1             | 1.195191  | -0.014226 | -2.437224 |
| 1             | 1.338577  | 0.152258  | 0.618729  |

|    |           |           |           |
|----|-----------|-----------|-----------|
| 1  | -1.487842 | -0.825587 | -2.123296 |
| 8  | 2.674939  | -1.078305 | -1.642253 |
| 8  | -1.854980 | -2.178799 | -0.610729 |
| 8  | -2.523886 | 0.751971  | -0.723258 |
| 8  | -0.264357 | 2.255806  | 0.464481  |
| 8  | 2.302626  | 1.496341  | -0.643358 |
| 15 | 0.383871  | -2.790388 | 1.222123  |
| 15 | -3.413790 | -2.239301 | -0.226049 |
| 15 | -3.666383 | 1.514418  | 0.124846  |
| 15 | -0.407263 | 3.884612  | 0.126916  |
| 15 | 3.294613  | 2.152370  | 0.454680  |
| 15 | 3.607549  | -1.806045 | -0.574036 |
| 8  | -3.745091 | 2.986313  | -0.008585 |
| 8  | -3.818896 | -1.622600 | 1.066051  |
| 8  | 0.772258  | -2.574700 | -0.350673 |
| 8  | -0.141506 | -1.576721 | 1.881474  |
| 8  | 3.428350  | -1.368914 | 0.856146  |
| 8  | 3.031496  | 3.578205  | 0.775461  |
| 8  | -0.707212 | 4.576445  | 1.391689  |
| 8  | 0.899252  | 4.269952  | -0.694040 |
| 8  | -1.464223 | 3.946800  | -1.071383 |
| 8  | -4.941874 | 0.790034  | -0.624188 |
| 8  | -3.621177 | 0.966739  | 1.600812  |
| 8  | -4.230648 | -1.753127 | -1.500817 |
| 8  | -3.493760 | -3.847687 | -0.216812 |
| 8  | -0.470164 | -4.140981 | 1.252343  |
| 8  | 1.780605  | -3.385240 | 1.744119  |
| 8  | 4.703001  | 1.930931  | -0.304690 |
| 8  | 3.284381  | 1.190578  | 1.713609  |
| 8  | 5.009915  | -1.489804 | -1.259925 |
| 8  | 3.504567  | -3.394587 | -0.727434 |
| 1  | -4.223299 | -4.153660 | 0.349844  |
| 1  | 2.843886  | -3.767526 | -0.107955 |

|   |           |           |           |
|---|-----------|-----------|-----------|
| 1 | -1.308968 | -4.059180 | 0.762028  |
| 1 | 2.426387  | -2.642909 | 1.839563  |
| 1 | -4.629416 | -0.860878 | -1.344364 |
| 1 | -5.633570 | 1.448228  | -0.809575 |
| 1 | 5.218241  | 2.754664  | -0.280629 |
| 1 | -2.378973 | 3.800591  | -0.722739 |
| 1 | 1.712031  | 4.207697  | -0.124219 |
| 1 | 3.461903  | 0.239072  | 1.490746  |
| 1 | 5.729500  | -2.033730 | -0.897921 |
| 1 | -3.704406 | -0.027250 | 1.625854  |

**Table S2.** Optimized bond lengths in Phytic Acid molecule calculated using Gaussian 09 software.

| Start C | End C | Bonds     | Distance (Å) |
|---------|-------|-----------|--------------|
| C3      | C6    | O36 - O40 | 8.66336      |
|         |       | O35 - O40 | 8.68755      |
|         |       | O36 - O39 | 10.02931     |
|         |       | O35 - O39 | 9.73720      |
| C2      | C5    | O34 - O42 | 8.67284      |
|         |       | O34 - O41 | 9.41882      |
|         |       | O33 - O42 | 9.42677      |
|         |       | O33 - O41 | 10.22937     |
| C1      | C4    | O32 - O37 | 8.47349      |
|         |       | O32 - O38 | 8.49739      |
|         |       | O31 - O37 | 8.74114      |
|         |       | O31 - O38 | 8.08227      |
| C1      | C3    | O32 - O35 | 6.35033      |
|         |       | O32 - O36 | 8.09959      |

|    |    |           |         |
|----|----|-----------|---------|
|    |    | O31 - O35 | 7.95262 |
|    |    | O31 - O36 | 9.24242 |
|    |    | O36 - O37 | 3.37440 |
| C3 | C4 | O36 - O38 | 5.64606 |
|    |    | O35 - O37 | 5.23670 |
|    |    | O35 - O38 | 7.02343 |
|    |    | O32 - O40 | 6.15647 |
| C1 | C6 | O32 - O39 | 6.53347 |
|    |    | O31 - O40 | 4.57910 |
|    |    | O31 - O39 | 4.48231 |
|    |    | O40 - O42 | 5.19913 |
| C5 | C6 | O40 - O41 | 4.35934 |
|    |    | O39 - O42 | 5.47504 |
|    |    | O39 - O41 | 3.56484 |
|    |    | O40 - O37 | 6.53719 |
| C4 | C6 | O40 - O38 | 4.81668 |
|    |    | O39 - O37 | 8.12737 |
|    |    | O38 - O39 | 6.30410 |

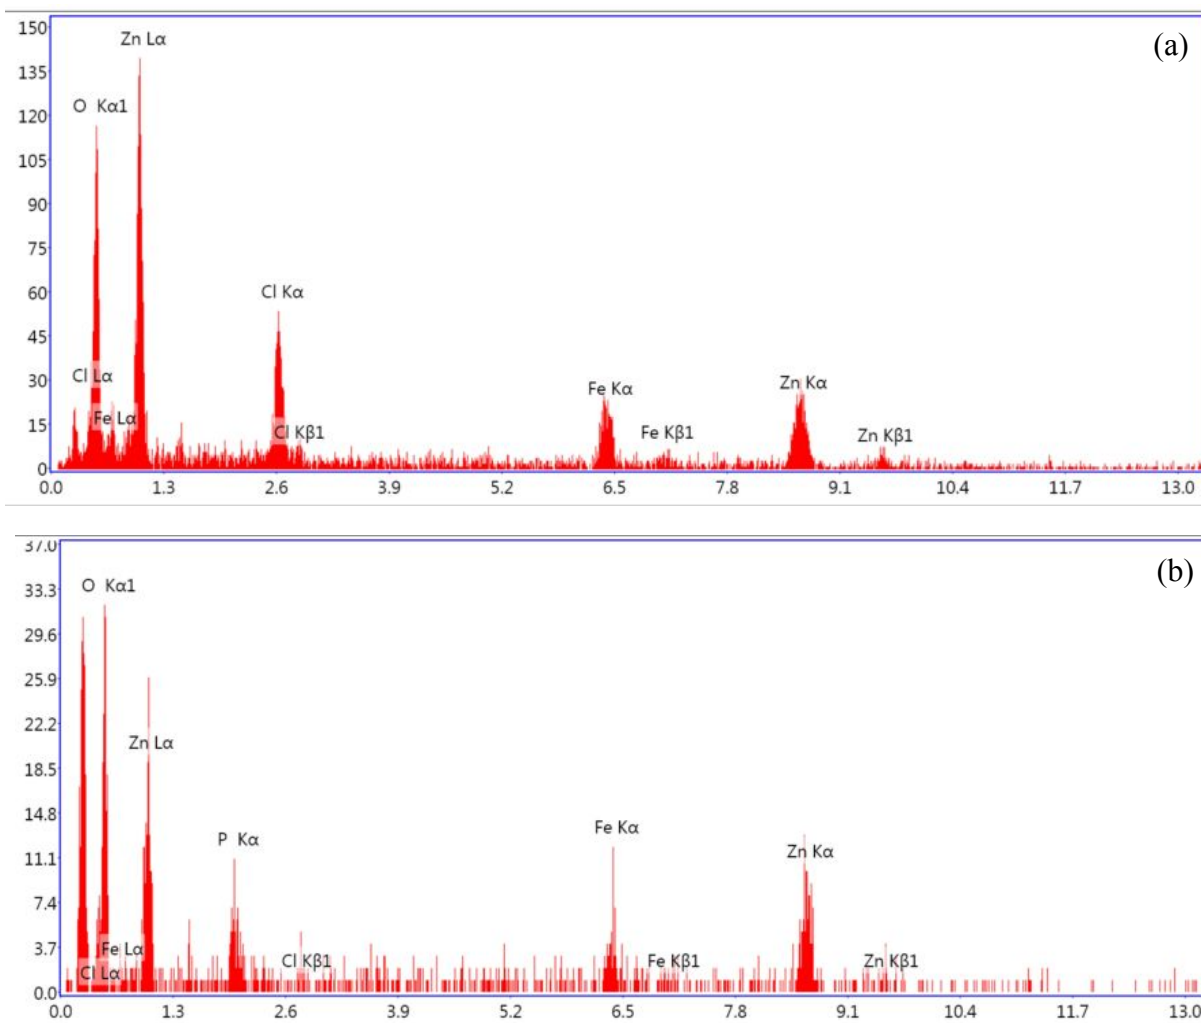

**Fig. S1.** EDX spectra for (a) ZLDH and (b) Z1.

**Table S3.** Elemental composition of ZLDH and Z1 obtained from EDX analysis.

| Elements | Atomic % |       |
|----------|----------|-------|
|          | ZLDH     | Z1    |
| Zn       | 22.26    | 24.62 |
| Fe       | 8.65     | 8.78  |
| Cl       | 9.48     | 0.14  |
| P        | 0.00     | 6.12  |
| O        | 60.50    | 56.33 |

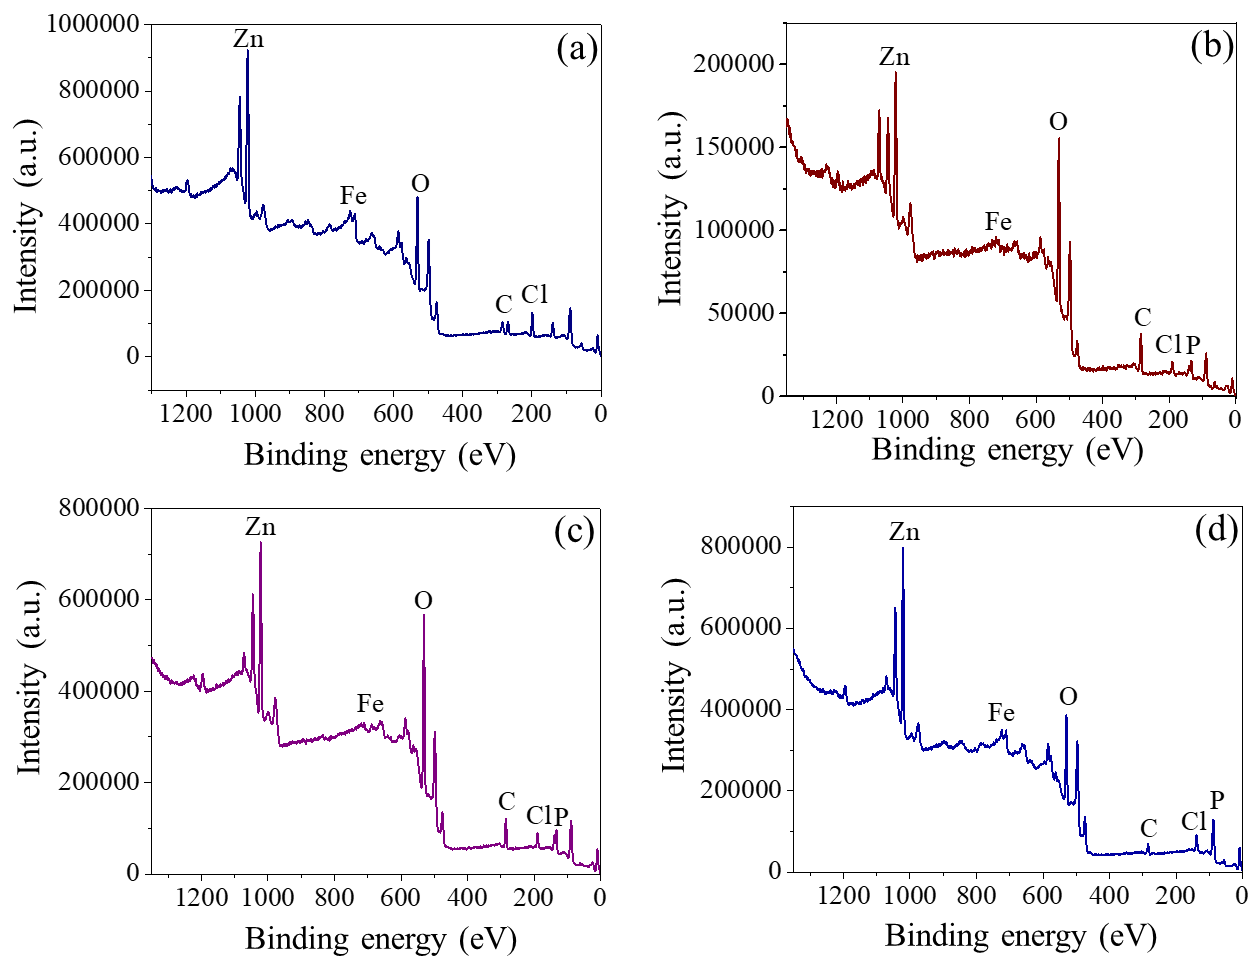

**Fig. S2.** XPS survey spectra for (a) ZLDH, (b) Z1, (c) ZAP1 and (d) ZAP5.

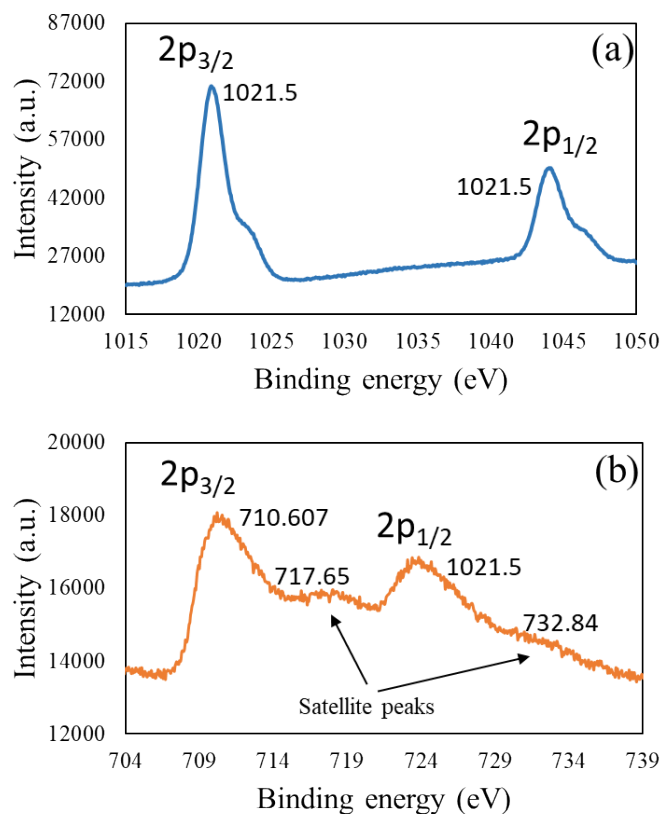

**Fig. S3.** XPS spectra for (a) Zn and (b) Fe in Zn-Fe-Cl LDH (ZLDH).

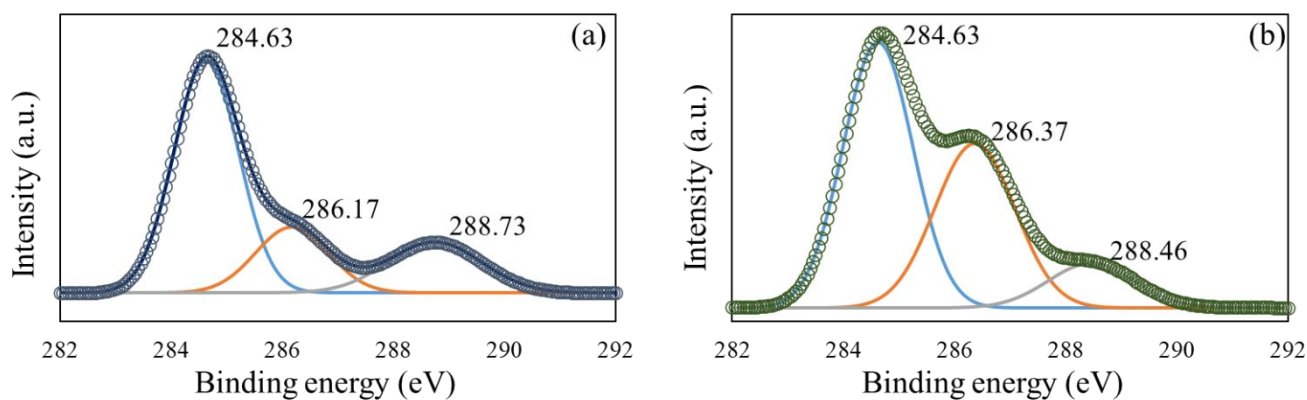

**Fig. S4.** Deconvoluted C 1s XPS spectra for (a) ZLDH and (b) Z1.



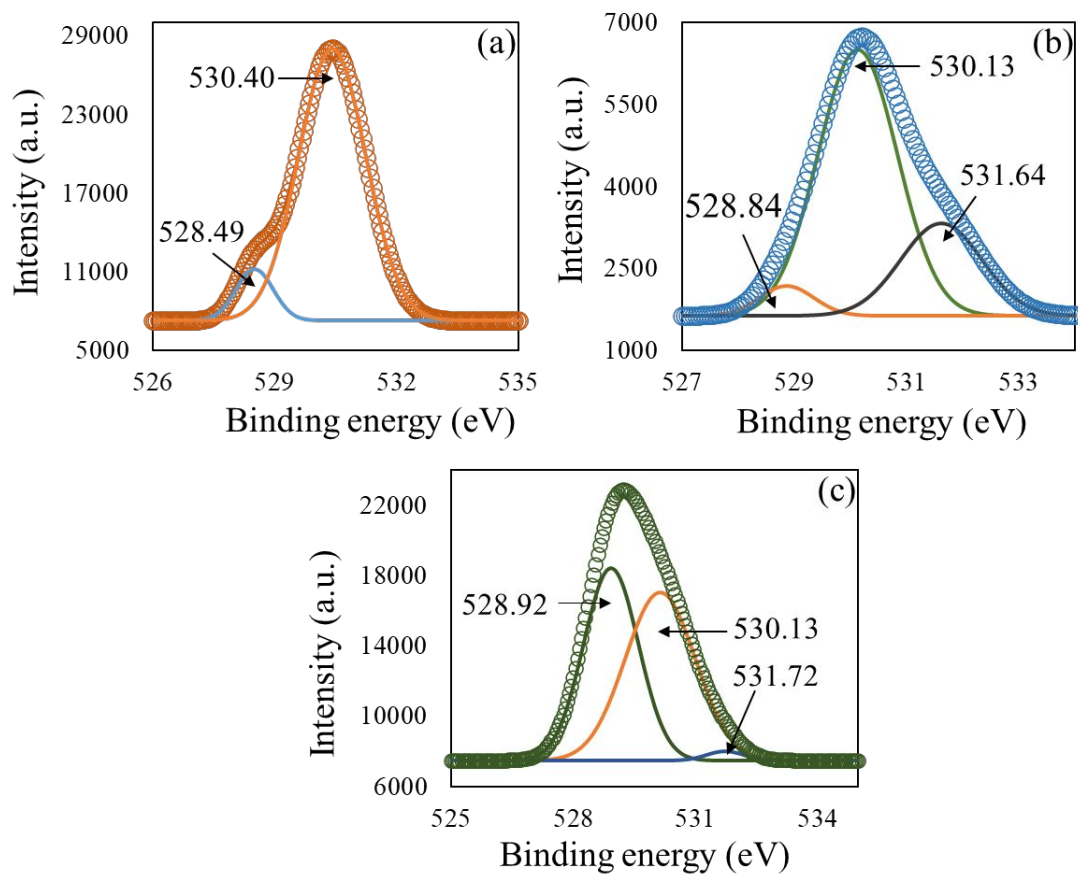

**Fig. S5.** Deconvoluted O 1s XPS spectra of (a) ZLDH, (b) Z1 and (c) ZAP5.

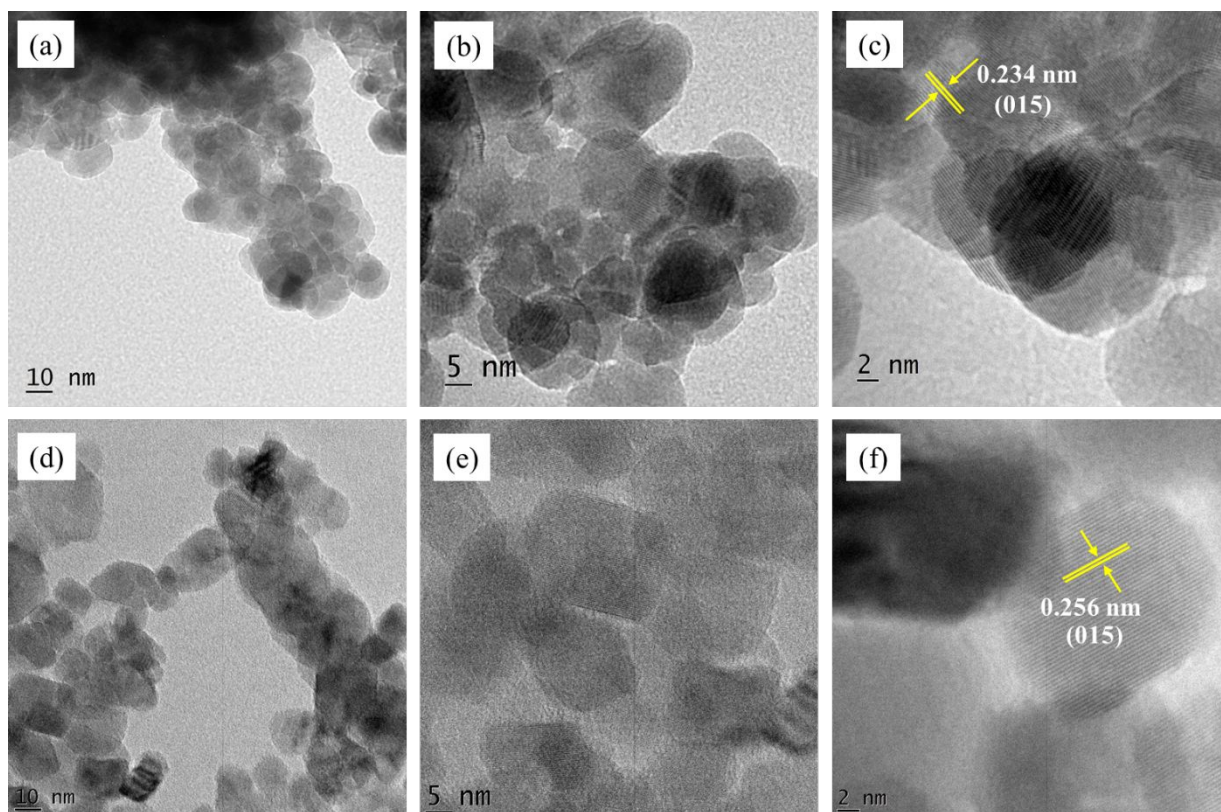

**Fig. S6.** HRTEM images for (a), (b), (c) ZLDH and (d), (e), (f) Z1.

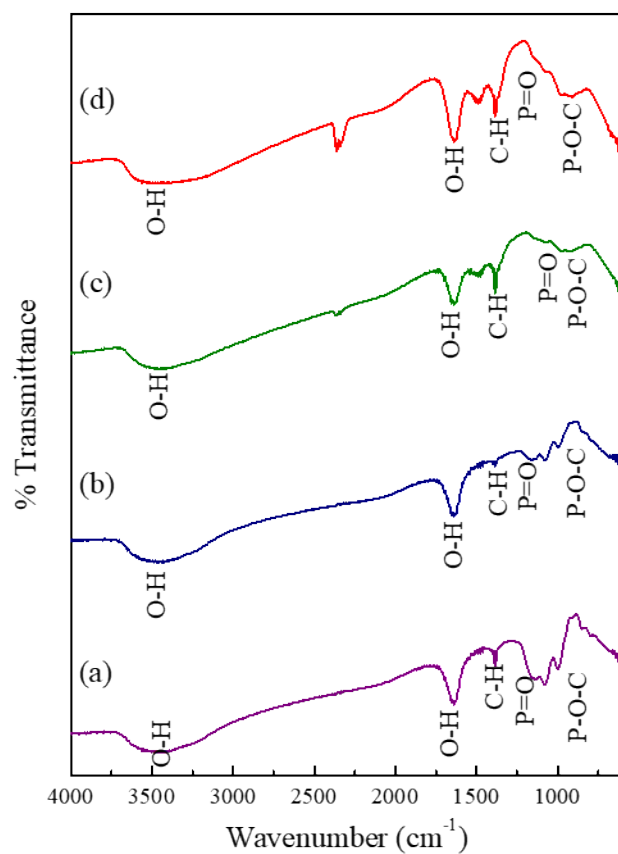

**Fig. S7.** FTIR spectra for (a) Z2, (b) Z3, (c) Z4 and (d) Z5

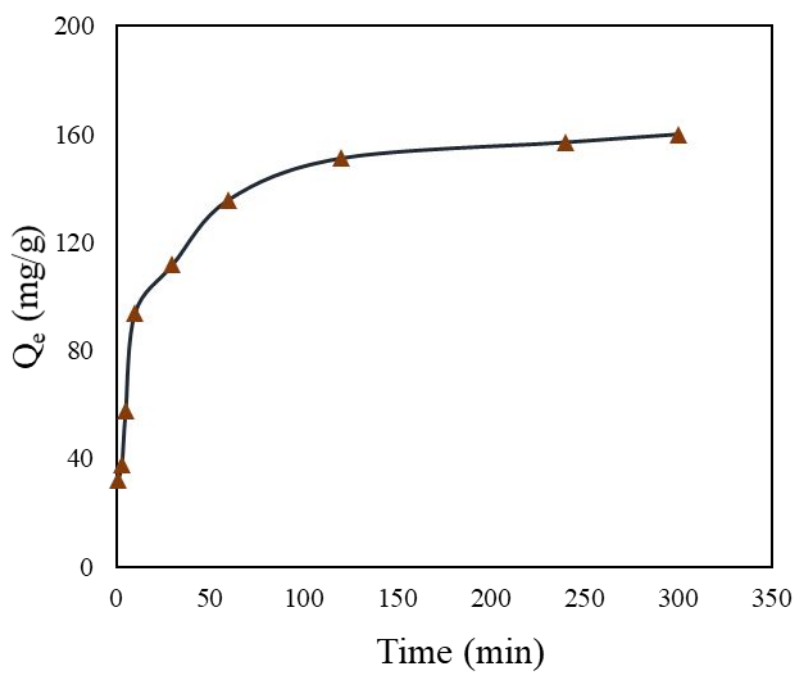

**Fig. S8.** Variation of adsorption capacity with time.

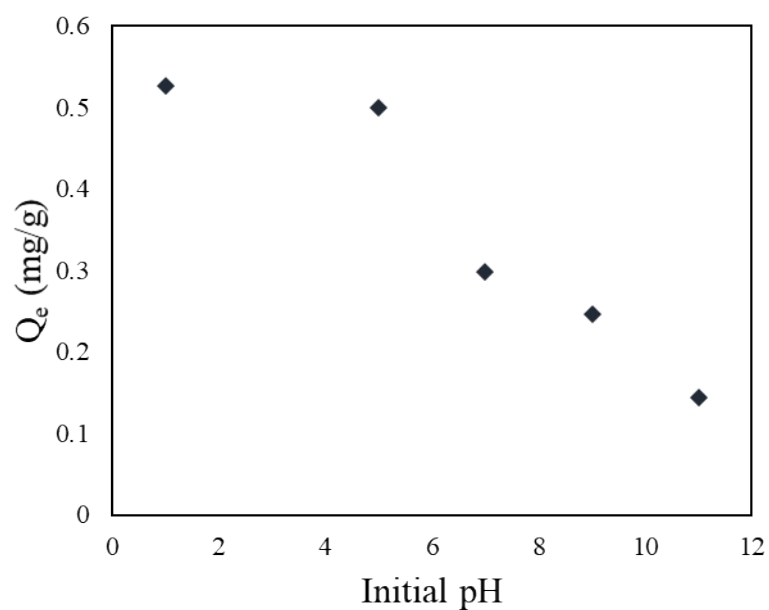

**Fig. S9.** Variation of adsorption capacity with pH of solution.

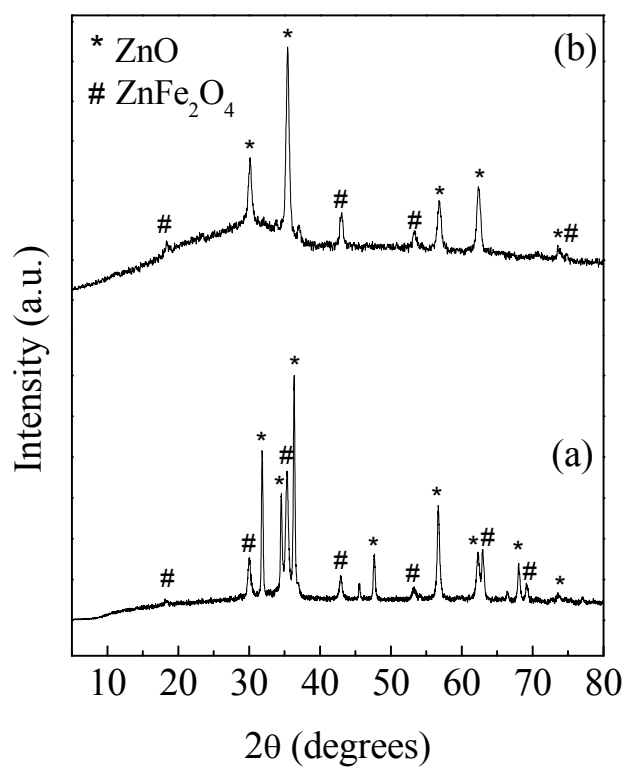

**Fig. S10.** PXR D pattern for (a) Calcined ZLDH (b) Product formed after reconstruction with sodium phytate solution. From the PXR D reflections, formation of mixed metal oxide phase is observed, instead of formation of phytate intercalated LDH structure.
